# Supplementary material for: Regulatory targets of quorum sensing in Vibrio cholerae: evidence for two distinct HapR-binding motifs
Source: PubMed Central journal article supplement — Nucleic Acids Res. 2009 Mar 10;37(8):2747–56. doi: 10.1093/nar/gkp121 (PMC2677876; doi:10.1093/nar/gkp121), 2009-03-10
Supplement: gkp121_1.pdf [file gkp121_1.pdf]

## Supporting information

**Table S1. Function and operon prediction of HapR regulated genes.**

| Gene ID        | Homolog                                                  | Putative function                      | Operon structure <sup>a</sup> | Regulation by HapR (from this study) | Reference                                 |
|----------------|----------------------------------------------------------|----------------------------------------|-------------------------------|--------------------------------------|-------------------------------------------|
| <b>Motif 1</b> |                                                          |                                        |                               |                                      |                                           |
| VC0166         | transcriptional regulator, TetR family                   | Regulation of multidrug efflux pump    | VC0166- VC0164                | Repressed                            | (Bina et al. 2008)                        |
| VC0432         | malate dehydrogenase                                     | Energy metabolism:TCA cycle            | -                             | Repressed                            | (Byun et al. 1999)                        |
| VC0900         | GGDEF family protein                                     | Regulation of biofilm formation        | -                             |                                      | (Waters et al. 2008)                      |
| VC1000         | acetyl-CoA carboxylase                                   | Fatty acid and phospholipid metabolism | -                             | Repressed                            | (Liu et al. 2008)                         |
| VC1181         | ATP-binding protein                                      | cytochrome assembly                    | VC1181-VC1180                 | Repressed                            | (Cruz-Ramos et al. 2004)                  |
| VC1222         | integration host factor, alpha subunit                   | Regulation of virulence genes          | VC1221-VC1222                 | Repressed                            | (Stonehouse et al. 2008)                  |
| VC1415         | hcp protein                                              | Type VI secreted protein               | -                             | Repressed                            | (Pukatzki et al. 2006)                    |
| VC2370         | sensory box/GGDEF family protein                         | Regulation of biofilm formation        | VC2372-VC2369                 |                                      | (Waters et al. 2008)                      |
| VC2635         | Penicillin-binding protein                               | peptidoglycan biosynthetic process     | -                             | Repressed                            | (Sengupta et al. 1990)                    |
| VC2762         | UDP-N-acetylglucosamine pyrophosphorylase                | Cell envelope Biosynthesis             | -                             | Activated                            | (Mengin-Lecreulx and van Heijenoort 1994) |
| VCA0017        | hcp protein                                              | Type VI secreted protein               | -                             | Repressed                            | (Pukatzki et al. 2006)                    |
| VCA0080        | GGDEF family protein                                     | Regulation of biofilm formation        | -                             |                                      | (Waters et al. 2008)                      |
| VCA0182        | sigma-54 dependent transcriptional regulator             | Regulation of NO reduction             | -                             | Repressed                            | (Rodionov et al. 2005)                    |
| VCA0183        | ferrisiderophore reductase/Flavo-haemoglobin             | NO reduction                           | -                             | Repressed                            | (Rodionov et al. 2005)                    |
| VCA0246        | Protein-N(pi)-phosphohistidine--sugar phosphotransferase | Sugar transport                        | VCA0246-VCA0244               | Repressed                            | (Beutler et al. 2000)                     |
| VCA0247        | DeoR family transcriptional regulator                    | Sugar transport                        | VCA0247-VCA0248               | Repressed                            | (Beutler et al. 2000)                     |
| <b>Motif 2</b> |                                                          |                                        |                               |                                      |                                           |
| VC0089         | Cytochrome c peroxidase                                  | Energy metabolism: Electron transport  | -                             | Activated                            | (Partridge et al. 2007)                   |
| VC0583         | transcriptional regulator HapR                           | Quorum sensing master regulator        |                               |                                      | (Zhu et al. 2002)                         |
| VC0934         | capsular polysaccharide biosynthesis glycosyltransferase | Biofilm formation                      | - <sup>b</sup>                | Repressed                            | (Yildiz and Schoolnik 1999)               |
| VC1213         | Response regulator VarA                                  | Regulating quorum sensing              | VC1213-VC1215                 | Repressed                            | (Lenz et al. 2005)                        |
| VC2035         | conserved hypothetical protein                           | Multiple antibiotic resistance         |                               | Repressed                            | (Sulavik et al. 1994)                     |
| VC2647         | Virulence regulator AphA                                 | Virulence activation                   |                               | Repressed                            | (Skorupski and Taylor 1999)               |
| VCA0148        | TagA-related protein                                     | unknown                                |                               | Activated                            |                                           |
| VCA0684        | Sugar phosphate permease                                 | Sugar transport                        | VCA0682-VCA0684               | Activated                            | (Verhamme et al. 2001)                    |
| VCA0865        | hemagglutinin/protease HapA                              | proteolysis                            |                               | Activated                            | (Jobling and Holmes 1997)                 |
| VCA0880        | Hypothetic protein                                       | unknown                                | VCA0880-VCA0883               | Activated                            | (Zhu and Mekalanos 2003)                  |

a. Operon structure prediction is based on VIMSS operon prediction from <http://www.microbesonline.org>.

b. located between two large vps operons.

## Figure Legends

**Fig. S1. Alignment highlighting similarity between proposed 16 bp HapR binding sites in *hapR* and *aphA* promoters.** Note that the binding sites appear weakly conserved when the direct strands are compared but show strong similarity when the proposed binding site on the direct strand for *aphA* is aligned with the corresponding binding site on the complementary strand upstream of *hapR*.

**Fig. S2. Schematic representation of procedure for identification of novel targets of HapR in *V. cholerae*.** Note that while experimental validation can be used to iteratively alter the binding motif definitions for both motifs, Motif 1 was not modified based on experimental feedback in the present study since all the predictions were validated.

**Fig. S3. Sequence logos corresponding to alignments of 22 bp binding regions for Motif 1 and Motif 2 sites.** Since Motif 1 is variable in length, it shows minimal conservation beyond the initial sequence even though almost all the sites have the concluding sequence AATAG. The logo also highlights the lack of conservation for Motif 2 binding sites beyond 16 bp.

## References

- Beutler R, Kaufmann M, Ruggiero F, Erni B (2000) The glucose transporter of the *Escherichia coli* phosphotransferase system: linker insertion mutants and split variants. *Biochemistry* 39(13): 3745-3750.
- Bina XR, Provenzano D, Nguyen N, Bina JE (2008) *Vibrio cholerae* RND family efflux systems are required for antimicrobial resistance, optimal virulence factor production, and colonization of the infant mouse small intestine. *Infection and immunity* 76(8): 3595-3605.
- Byun R, Elbourne LD, Lan R, Reeves PR (1999) Evolutionary relationships of pathogenic clones of *Vibrio cholerae* by sequence analysis of four housekeeping genes. *Infection and immunity* 67(3): 1116-1124.
- Cruz-Ramos H, Cook GM, Wu G, Cleeter MW, Poole RK (2004) Membrane topology and mutational analysis of *Escherichia coli* CydDC, an ABC-type cysteine exporter required for cytochrome assembly. *Microbiology (Reading, England)* 150(Pt 10): 3415-3427.
- Jobling MG, Holmes RK (1997) Characterization of hapR, a positive regulator of the *Vibrio cholerae* HA/protease gene hap, and its identification as a functional homologue of the *Vibrio harveyi* luxR gene. *Mol Microbiol* 26(5): 1023-1034.
- Lenz DH, Miller MB, Zhu J, Kulkarni RV, Bassler BL (2005) CsrA and three redundant small RNAs regulate quorum sensing in *Vibrio cholerae*. *Mol Microbiol* 58(4): 1186-1202.
- Liu X, Fortin PD, Walsh CT (2008) Andrimid producers encode an acetyl-CoA carboxyltransferase subunit resistant to the action of the antibiotic. *Proceedings of the National Academy of Sciences of the United States of America* 105(36): 13321-13326.
- Mengin-Lecreulx D, van Heijenoort J (1994) Copurification of glucosamine-1-phosphate acetyltransferase and N-acetylglucosamine-1-phosphate uridyltransferase activities of *Escherichia coli*: characterization of the glmU gene product as a bifunctional enzyme catalyzing two subsequent steps in the pathway for UDP-N-acetylglucosamine synthesis. *J Bacteriol* 176(18): 5788-5795.
- Partridge JD, Poole RK, Green J (2007) The *Escherichia coli* yhjA gene, encoding a predicted cytochrome c peroxidase, is regulated by FNR and OxyR. *Microbiology (Reading, England)* 153(Pt 5): 1499-1507.
- Pukatzki S, Ma AT, Sturtevant D, Krastins B, Sarracino D et al. (2006) Identification of a conserved bacterial protein secretion system in *Vibrio cholerae* using the *Dictyostelium* host model system. *Proceedings of the National Academy of Sciences of the United States of America* 103(5): 1528-1533.
- Rodionov DA, Dubchak IL, Arkin AP, Alm EJ, Gelfand MS (2005) Dissimilatory metabolism of nitrogen oxides in bacteria: comparative reconstruction of transcriptional networks. *PLoS computational biology* 1(5): e55.
- Sengupta TK, Chatterjee AN, Das J (1990) Penicillin binding proteins of *Vibrio cholerae*. *Biochemical and biophysical research communications* 171(3): 1175-1181.
- Skorupski K, Taylor RK (1999) A new level in the *Vibrio cholerae* ToxR virulence cascade: AphA is required for transcriptional activation of the tcpPH operon. *Mol Microbiol* 31(3): 763-771.
- Stonehouse E, Kovacicova G, Taylor RK, Skorupski K (2008) Integration host factor positively regulates virulence gene expression in *Vibrio cholerae*. *J Bacteriol* 190(13): 4736-4748.
- Sulavik MC, Gambino LF, Miller PF (1994) Analysis of the genetic requirements for inducible multiple-antibiotic resistance associated with the mar locus in *Escherichia coli*. *J Bacteriol* 176(24): 7754-7756.
- Verhamme DT, Arents JC, Postma PW, Crielaard W, Hellingwerf KJ (2001) Glucose-6-phosphate-dependent phosphoryl flow through the Uhp two-component regulatory system. *Microbiology (Reading, England)* 147(Pt 12): 3345-3352.
- Waters CM, Lu W, Rabinowitz JD, Bassler BL (2008) Quorum sensing controls biofilm formation in *Vibrio cholerae* through modulation of cyclic di-GMP levels and repression of vpsT. *J Bacteriol* 190(7): 2527-2536.
- Yildiz FH, Schoolnik GK (1999) *Vibrio cholerae* O1 El Tor: identification of a gene cluster required for the rugose colony type, exopolysaccharide production, chlorine resistance, and biofilm formation. *Proceedings of the National Academy of Sciences of the United States of America* 96(7): 4028-4033.

Zhu J, Mekalanos JJ (2003) Quorum sensing-dependent biofilms enhance colonization in *Vibrio cholerae*. *Dev Cell* 5(4): 647-656.

Zhu J, Miller MB, Vance RE, Dziejman M, Bassler BL et al. (2002) Quorum-sensing regulators control virulence gene expression in *Vibrio cholerae*. *Proceedings of the National Academy of Sciences of the United States of America* 99(5): 3129-3134.

|       |       |     |                  |     |  |            |
|-------|-------|-----|------------------|-----|--|------------|
|       |       | -82 |                  | -67 |  | Similarity |
| 5'→3' | aphA  |     | TTATTGAGAATAATGT |     |  |            |
| 5'→3' | hapR  |     | ACAAAATAATCATTAG |     |  | 4/16       |
|       |       | +18 |                  | +33 |  |            |
| 5'→3' | aphA  | -82 | TTATTGAGAATAATGT | -67 |  |            |
| 3'→5' | hapRc | +33 | CTAATGATTATTTTGT | +18 |  | 10/16      |

**Fig. S1. Tsou, et al.**

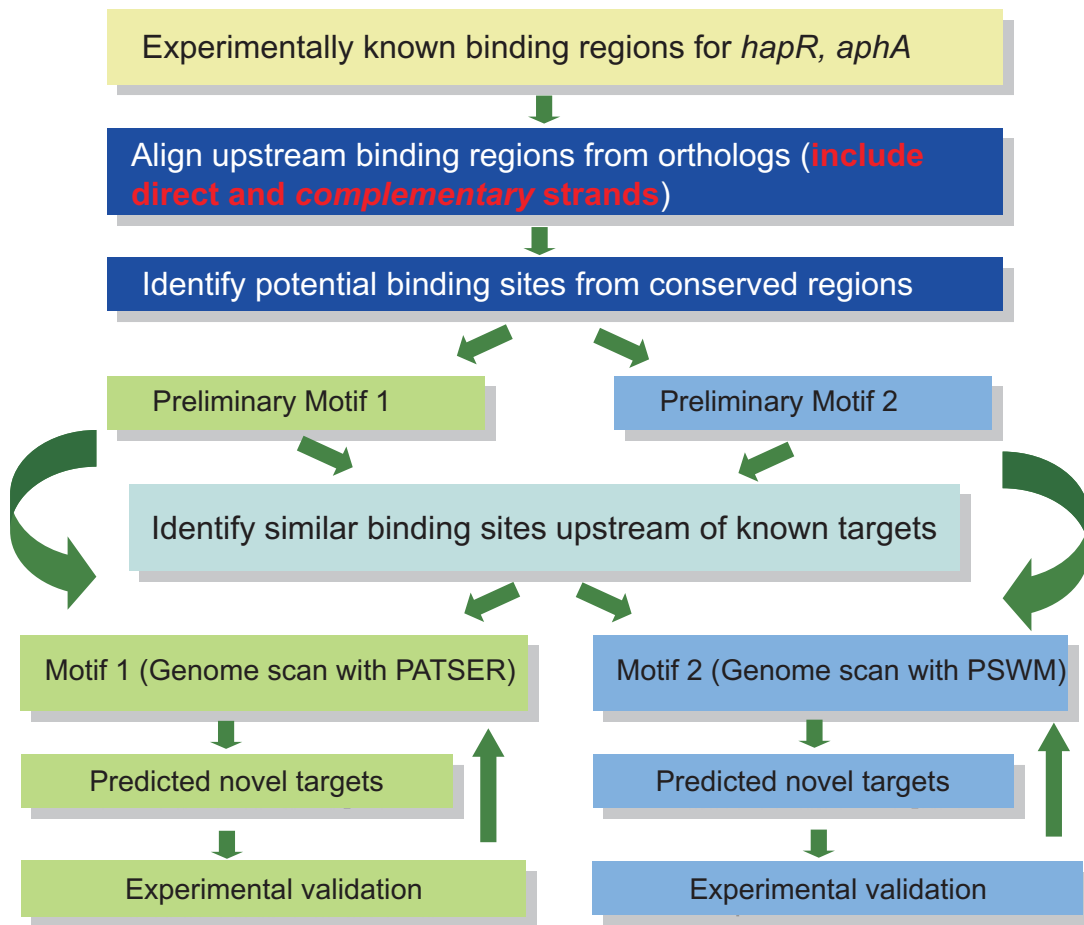

Fig. S2. Tsou, et. al.

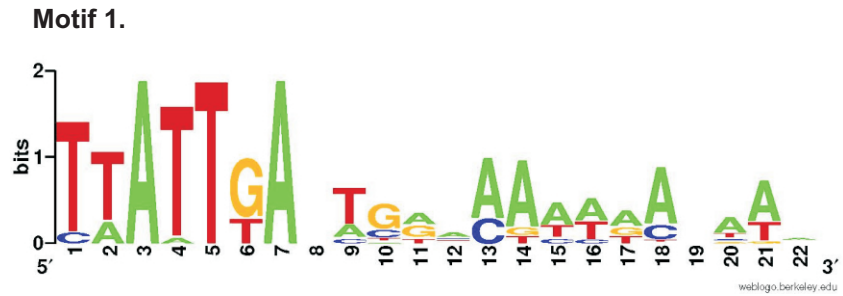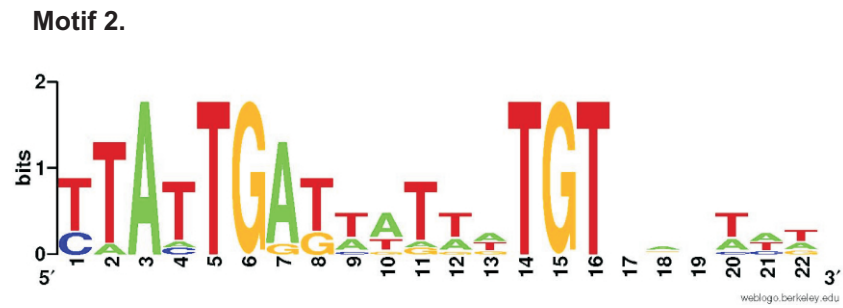

**Fig. S3. Tsou, et al.**
